# Supplementary material for: Tailoring benzo[α]phenoxazine moiety for efficient photosensitizers in dye sensitized solar cells via the DFT/TD-DFT method
Source: Royal Society of Chemistry journal article supplement (doi:10.1039/d2nj02589b), 2022-01-01
Supplement: d2nj02589b1.pdf [file d2nj02589b1.pdf]

## Supplementary Information

### Tailoring on Benzo[*a*]phenoxazine moiety for efficient photosensitizers in Dye Sensitized Solar Cell via DFT/TD-DFT method

Suprabha S. Sahoo<sup>a,b</sup>, Manilal Murmu<sup>c,d</sup>, Priyabrata Banerjee<sup>\*c,d</sup>,

Habib M Pathan<sup>b</sup>, Sunita Salunke-Gawali<sup>\*a</sup>

<sup>a</sup>*Department of Chemistry, Savitribai Phule Pune University, Pune 411007, India*

<sup>a</sup>*Department of Physics, Savitribai Phule Pune University, Pune 411007, India*

<sup>c</sup>*Surface Engineering & Tribology Group, CSIR-Central Mechanical Engineering Research Institute, M.G. Avenue, Durgapur 713209, West Bengal, India*

<sup>d</sup>*Academy of Scientific and Innovative Research (AcSIR), AcSIR Headquarters CSIR-HRDC Campus, Sector-19, Kamla Nehru Nagar, Ghaziabad, 201002, India*

#### \*Corresponding author

E-mail addresses: pr\_banerjee@cmeri.res.in (Priyabrata Banerjee)

[sunita.salunke@unipune.ac.in](mailto:sunita.salunke@unipune.ac.in) (Sunita Salunke-Gawali)

#### Figure Caption:

Fig. S1 Non-Covalent interaction (NCI)-Reduced density gradient (RDG) calculation plots

Fig. S2 Radial Distribution plot

#### Table Captions:

Table S1 Bond lengths (Å) and bond angles (°) of the optimized forms of M-0, M-1, M-2 and M-3

Table S2 NBO, HOMO and LUMO calculation values

Table S3 Adsorption energy Calculation

M-0

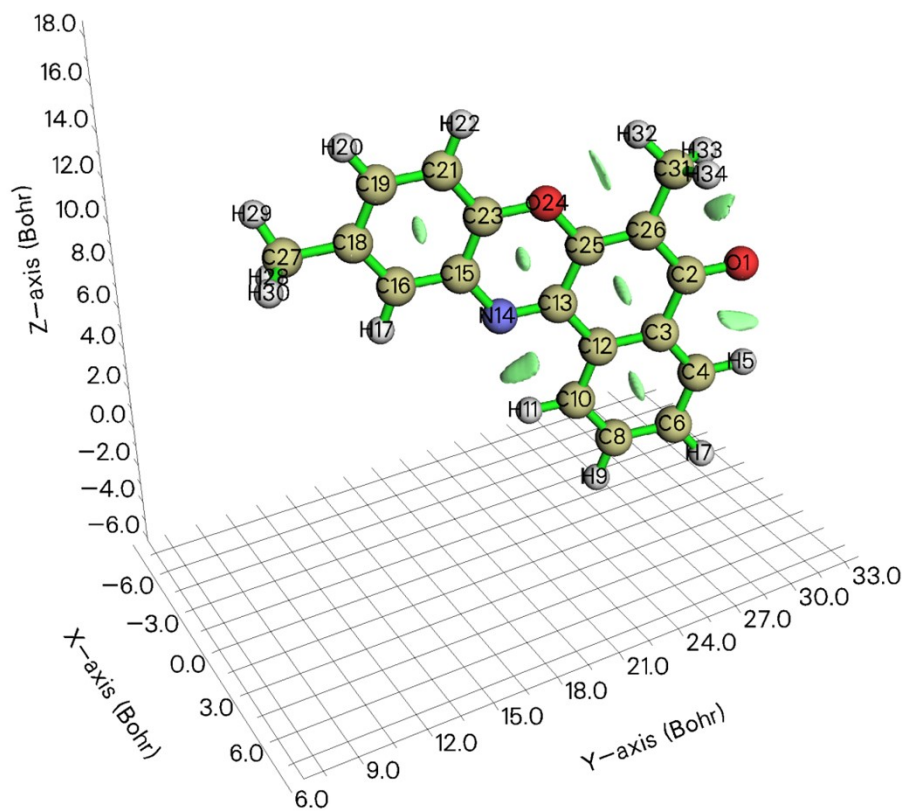

M-1

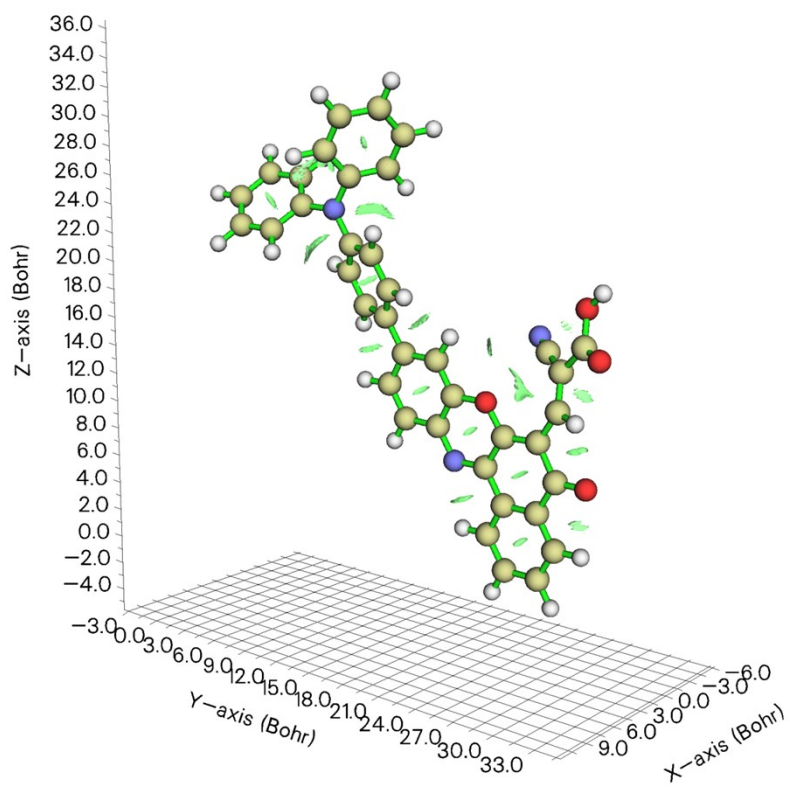

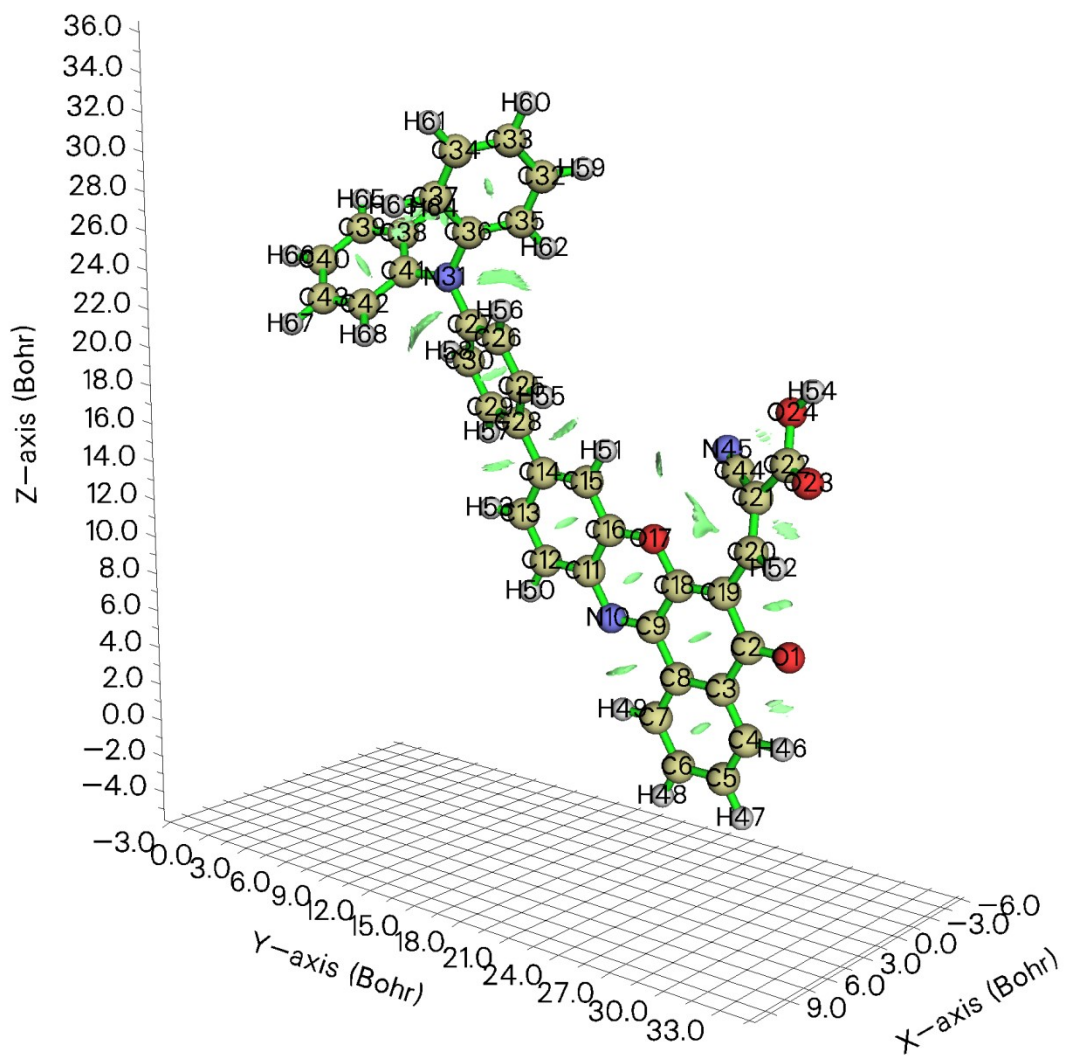

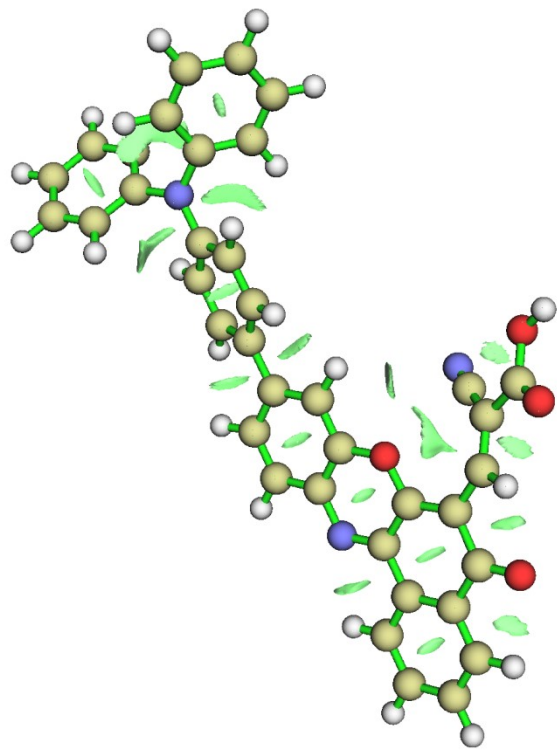

M-2

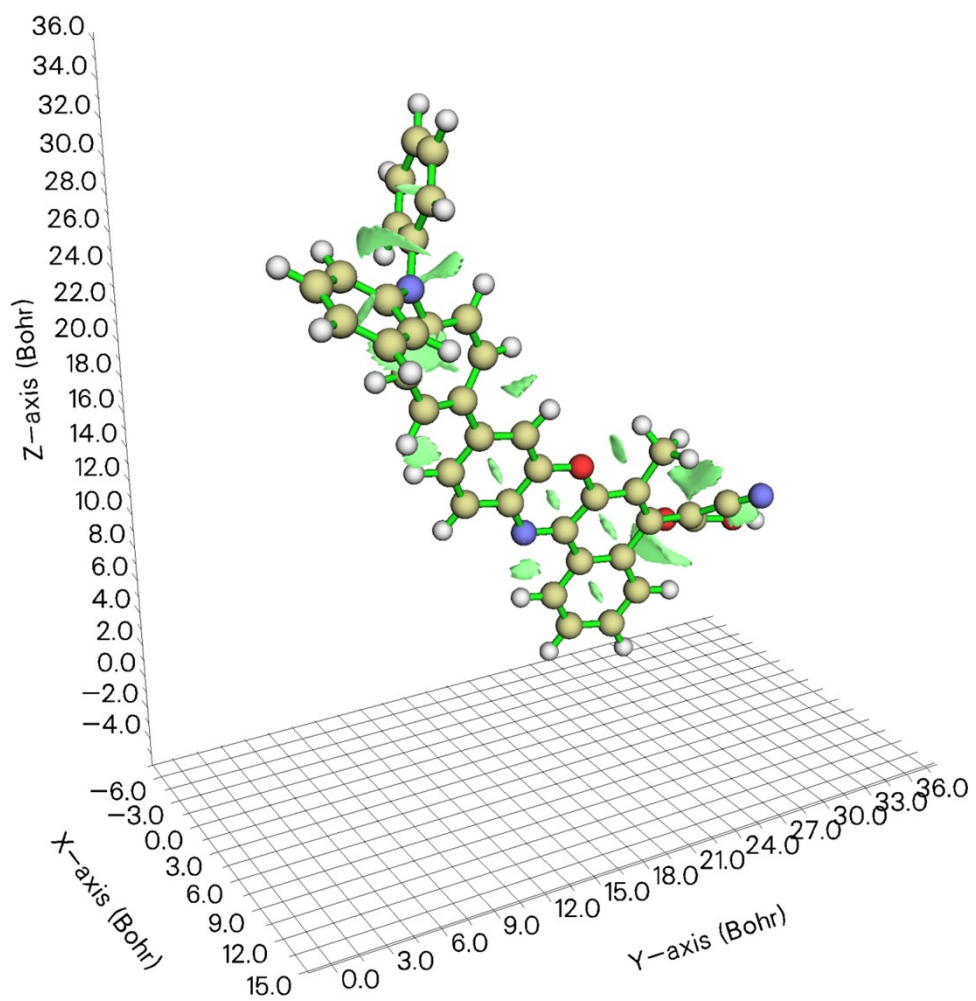

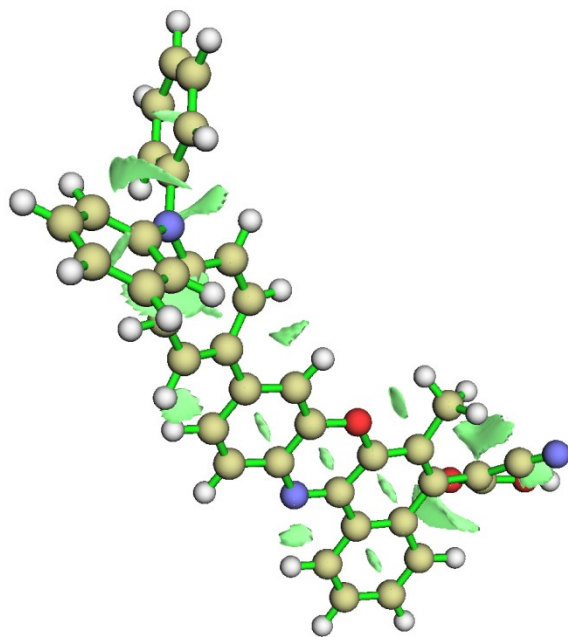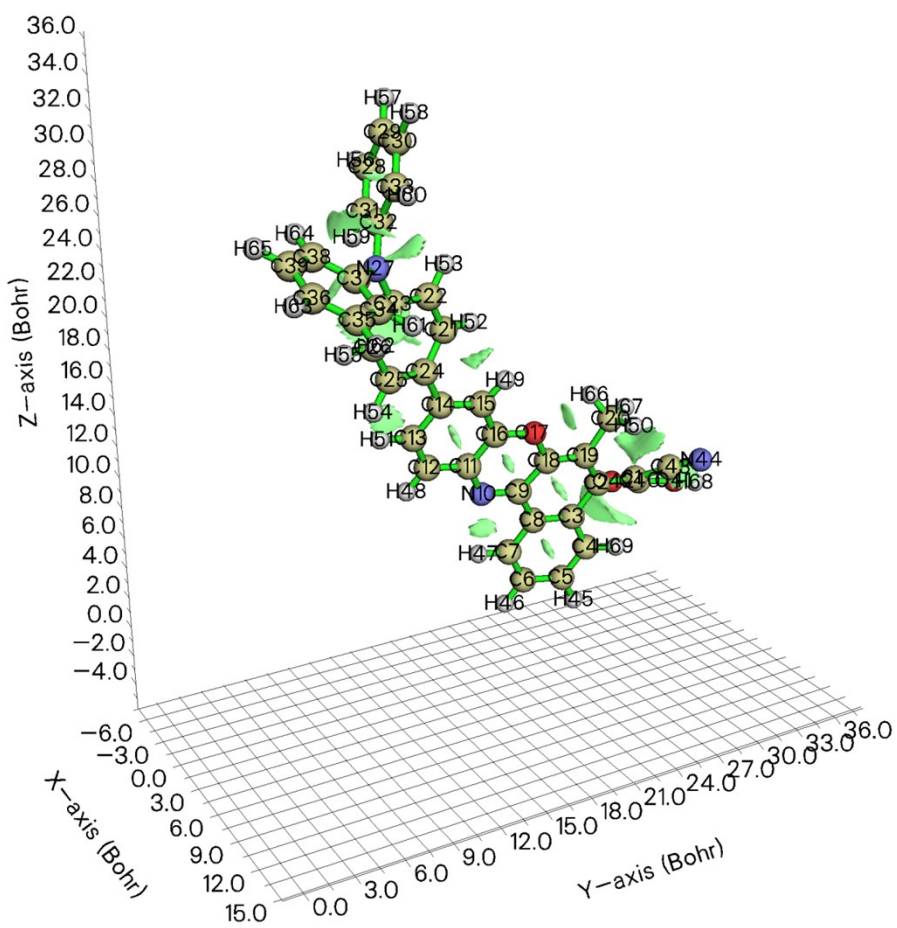

M-3

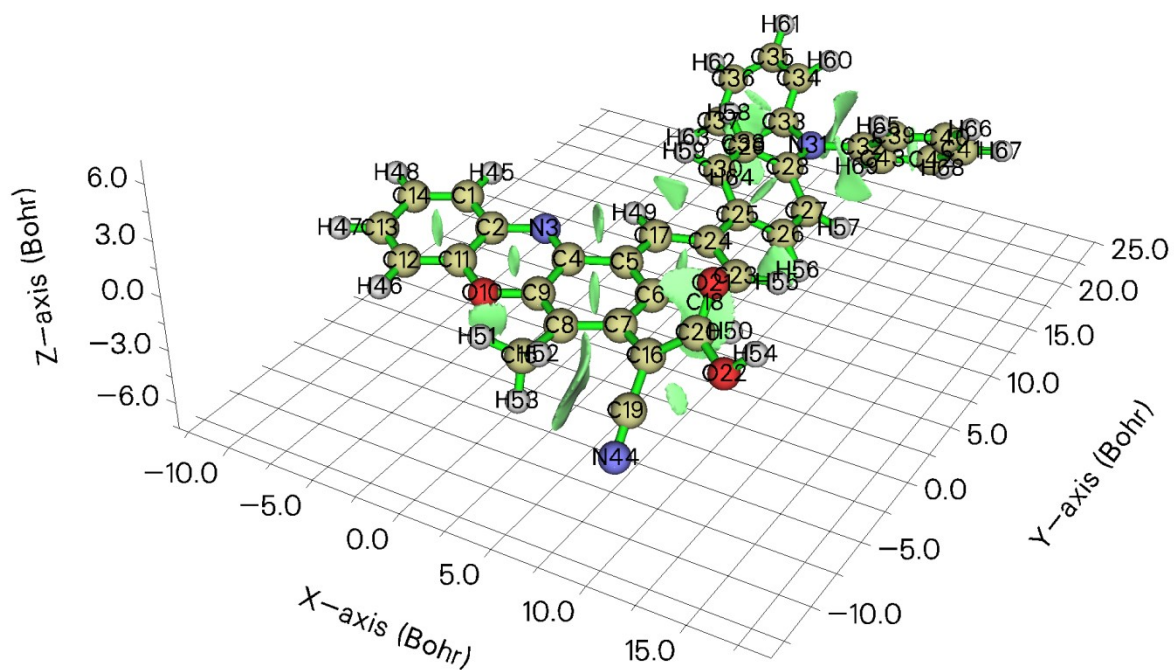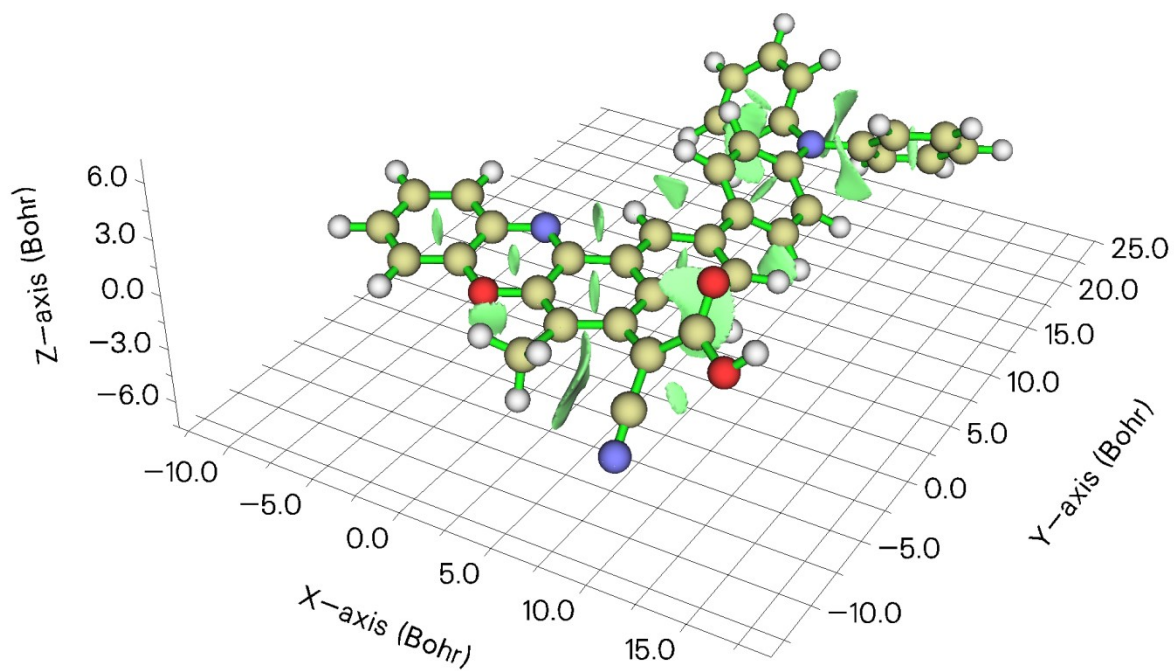



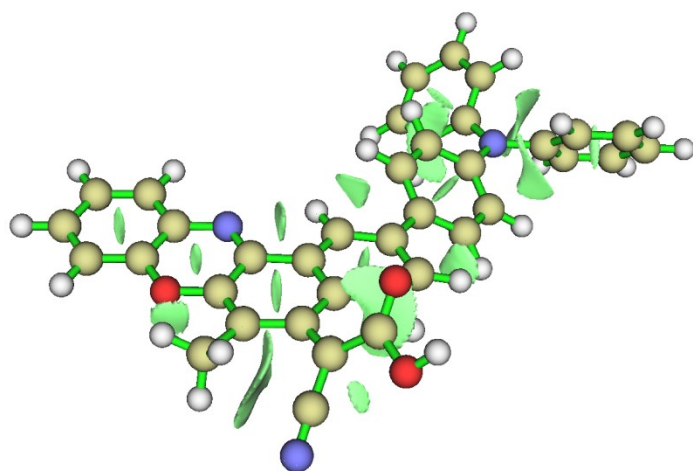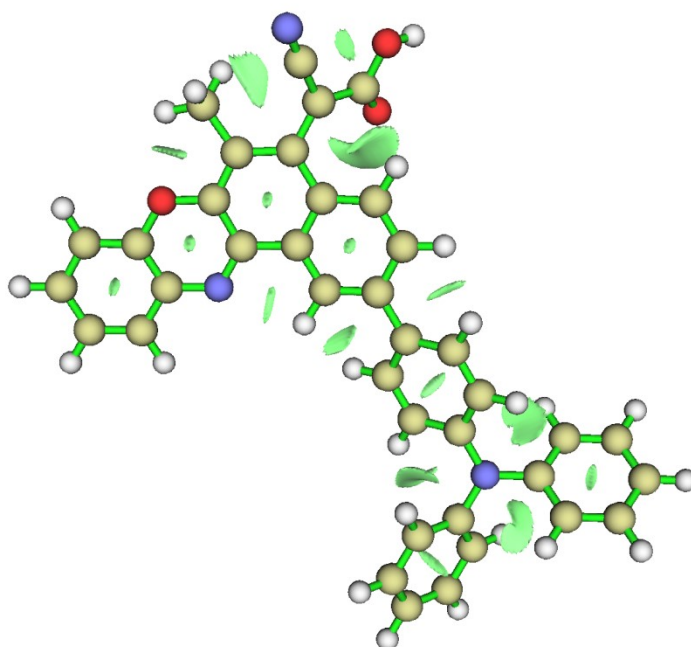

**Figure S1** Non-Covalent interaction (NCI)-Reduced density gradient (RDG) plots of M-0, M-1, M-2 and M-3

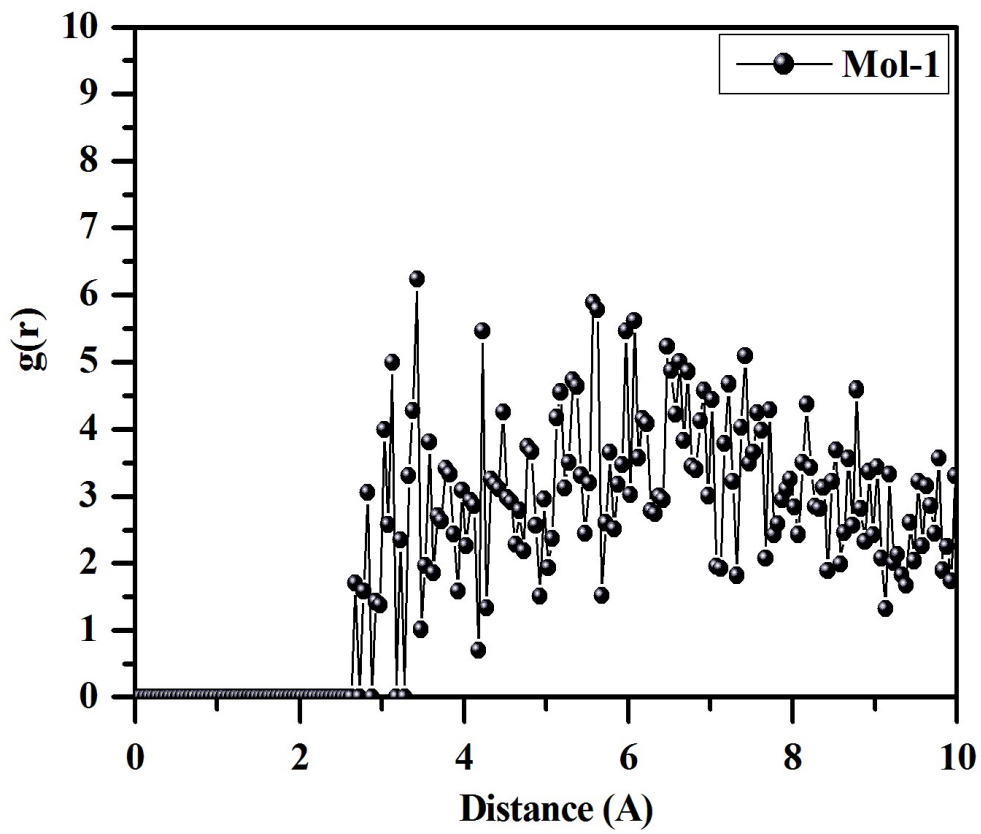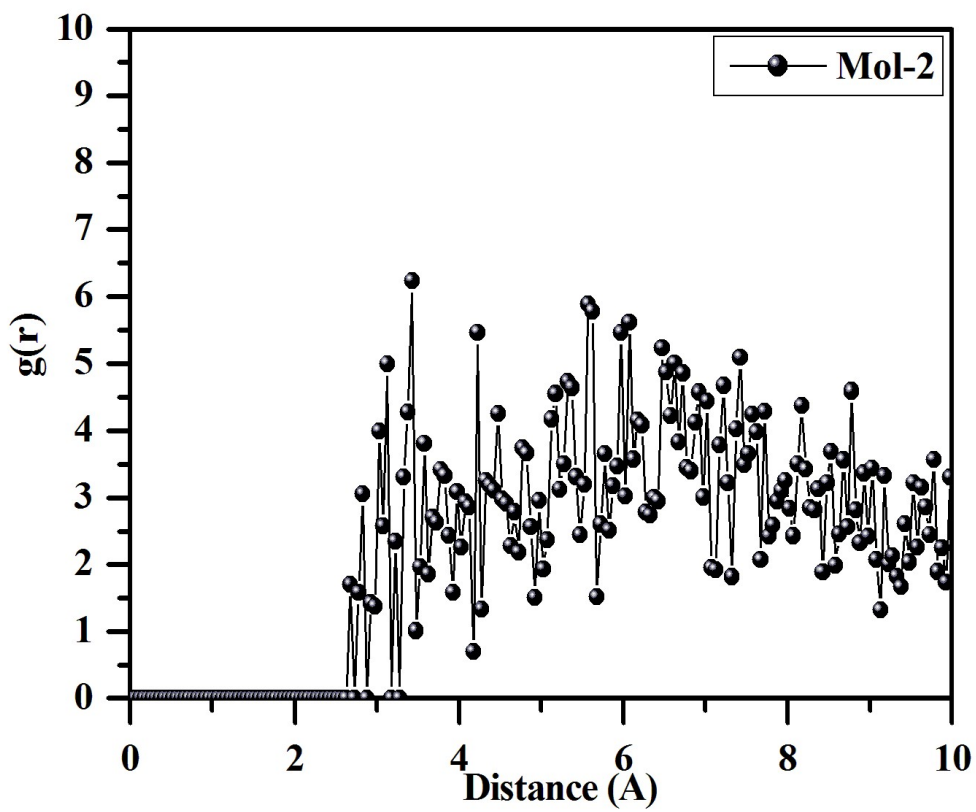

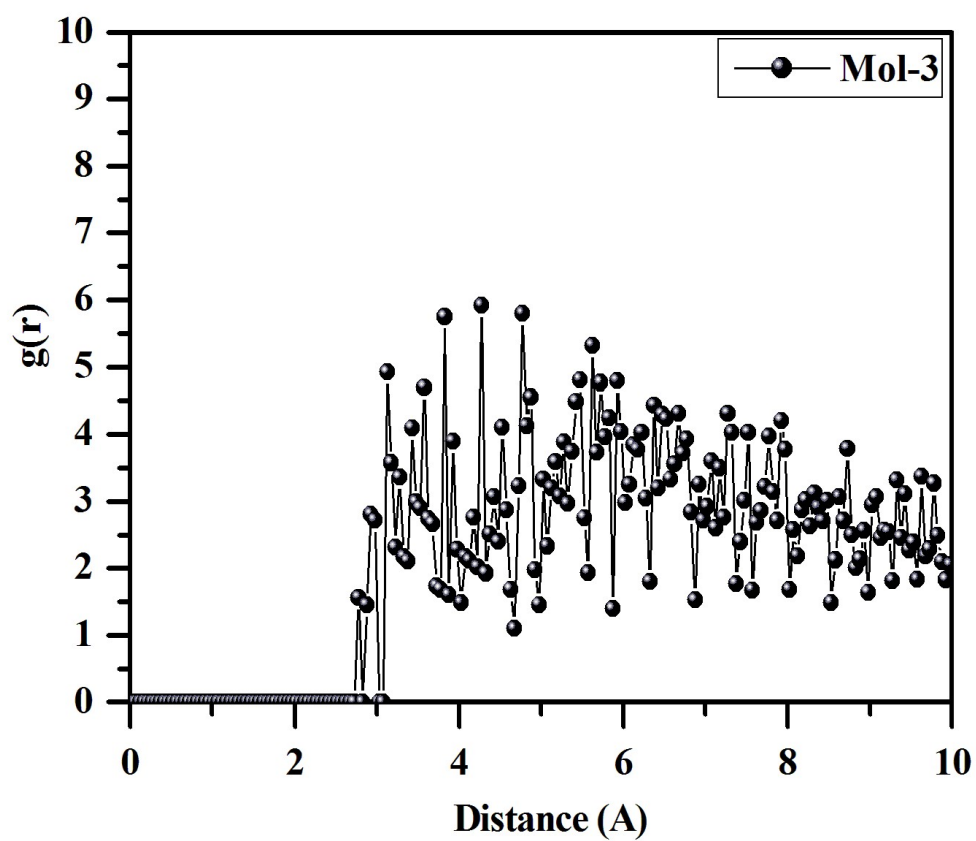

Figure S2 Radial Distribution plot

**Table S1**

Bond lengths (Å) and bond angles (°) of the optimized forms of M-3B, M-1, M-2 and M-3

| Geometrical parameters    | M-3B  | M-1   | M-2   | M-3   |
|---------------------------|-------|-------|-------|-------|
| <b>Bond lengths ( Å )</b> |       |       |       |       |
| C1-C2                     | 1.407 | 1.425 | 1.428 | 1.411 |
| C2-C3                     | 1.391 | 1.383 | 1.380 | 1.388 |
| C3-C4                     | 1.410 | 1.415 | 1.417 | 1.413 |
| C4-C5                     | 1.409 | 1.412 | 1.418 | 1.413 |
| C5-C6                     | 1.398 | 1.387 | 1.387 | 1.395 |
| C6-C1                     | 1.396 | 1.409 | 1.408 | 1.394 |
| C4-N7                     | 1.383 | 1.364 | 1.357 | 1.372 |
| N7-C8                     | 1.301 | 1.311 | 1.319 | 1.309 |
| C8-C9                     | 1.467 | 1.454 | 1.442 | 1.451 |
| C9-O10                    | 1.367 | 1.346 | 1.356 | 1.356 |
| O10-C5                    | 1.369 | 1.370 | 1.363 | 1.364 |
| C8-C11                    | 1.471 | 1.467 | 1.456 | 1.462 |
| C11-C12                   | 1.413 | 1.414 | 1.423 | 1.421 |
| C12-C13                   | 1.490 | 1.486 | 1.471 | 1.468 |
| C13-C14                   | 1.463 | 1.479 | 1.427 | 1.436 |
| C14-C9                    | 1.368 | 1.391 | 1.394 | 1.388 |
| C11-C15                   | 1.407 | 1.408 | 1.410 | 1.402 |
| C15-C16                   | 1.393 | 1.392 | 1.388 | 1.403 |
| C16-C17                   | 1.404 | 1.405 | 1.406 | 1.416 |
| C17-C18                   | 1.393 | 1.392 | 1.388 | 1.386 |
| C18-C12                   | 1.405 | 1.406 | 1.416 | 1.414 |
| C13-O19                   | 1.241 | 1.237 | —     | —     |
| C13- C19                  | —     | —     | 1.443 | 1.435 |
| C14-C20                   | 1.503 | 1.442 | 1.510 | 1.510 |
| C20-C21                   | —     | 1.371 | —     | —     |
| C21-C22                   | —     | 1.429 | —     | —     |

|         |   |       |       |       |
|---------|---|-------|-------|-------|
| C19-C22 | — | —     | 1.414 | 1.418 |
| C19-C21 | — | —     | 1.467 | 1.467 |
| C22-N23 | — | 1.158 | 1.166 | 1.164 |
| C21-C24 | — | 1.493 | —     | —     |
| C21-O24 | — | —     | 1.223 | 1.224 |
| C21-O25 | — | —     | 1.367 | 1.360 |
| C24-O25 | — | 1.216 | —     | —     |
| C24-O26 | — | 1.345 | —     | —     |
| C1-C27  | — | 1.475 | —     | —     |
| C1-C26  | — | —     | 1.474 | —     |
| C16-C26 | — | —     | —     | 1.480 |
| C26-C27 | — | —     | 1.413 | 1.411 |
| C27-C28 | — | 1.413 | 1.389 | 1.392 |
| C28-C29 | — | 1.389 | 1.413 | 1.410 |
| C29-C30 | — | 1.413 | 1.412 | 1.410 |
| C30-C31 | — | 1.412 | 1.390 | 1.391 |
| C31-C32 | — | 1.390 | —     | —     |
| C31-C26 | — | —     | 1.413 | 1.412 |
| C32-C27 | — | 1.413 | —     | —     |
| C29-N32 | — | —     | 1.403 | 1.409 |
| C30-N33 | — | 1.404 | —     | —     |
| N32-C33 | — | —     | 1.429 | 1.427 |
| N33-C34 | — | 1.429 | —     | —     |
| C34-C35 | — | 1.406 | 1.406 | 1.406 |
| C35-C36 | — | 1.397 | 1.397 | 1.397 |
| C36-C37 | — | 1.400 | 1.400 | 1.400 |
| C37-C38 | — | 1.400 | 1.398 | 1.397 |
| C38-C39 | — | 1.398 | —     | —     |
| C38-C33 | — | —     | 1.405 | 1.406 |
| C39-C34 | — | 1.405 | —     | —     |
| N32-C39 | — | —     | 1.429 | 1.427 |

|         |   |       |       |       |
|---------|---|-------|-------|-------|
| N33-C40 | — | 1.429 | —     | —     |
| C39-C40 | — | —     | 1.405 | 1.406 |
| C40-C41 | — | 1.405 | 1.398 | 1.397 |
| C41-C42 | — | 1.398 | 1.400 | 1.400 |
| C42-C43 | — | 1.400 | 1.400 | 1.400 |
| C43-C44 | — | 1.400 | 1.397 | 1.337 |
| C44-C39 | — | —     | 1.406 | 1.406 |
| C44-C45 | — | 1.397 | —     | —     |
| C45-C40 | — | 1.406 | —     | —     |

**Bond angles (°)**

|             |        |        |        |        |
|-------------|--------|--------|--------|--------|
| C1-C2-C3    | 120.09 | 121.75 | 121.80 | 120.29 |
| C2-C3-C4    | 120.15 | 120.34 | 120.36 | 119.95 |
| C3-C4-C5    | 118.60 | 117.49 | 117.45 | 120.69 |
| C4-C5-C6    | 121.81 | 122.75 | 122.55 | 122.60 |
| C5-C6-C1    | 118.55 | 119.59 | 119.72 | 118.24 |
| C4-N7-C8    | 119.05 | 119.42 | 119.03 | 119.07 |
| N7-C8-C9    | 122.39 | 121.64 | 122.00 | 122.29 |
| C8-C9-O10   | 117.53 | 117.98 | 118.87 | 117.72 |
| C9-C10-C5   | 120.41 | 121.11 | 120.80 | 120.81 |
| O10-C5-C4   | 119.65 | 118.68 | 118.83 | 119.25 |
| C5-C4-N7    | 120.97 | 121.11 | 121.25 | 120.83 |
| C8-C11-C12  | 119.45 | 119.63 | 119.15 | 119.04 |
| C11-C12-C13 | 120.89 | 121.19 | 120.68 | 121.08 |
| C12-C13-C14 | 118.89 | 118.36 | 119.60 | 119.28 |
| C13-C14-C9  | 118.96 | 118.66 | 118.25 | 118.27 |
| C14-C9-C8   | 124.13 | 123.62 | 124.37 | 124.46 |
| C9-C8-C11   | 117.69 | 118.30 | 117.50 | 117.14 |
| C11-C15-C16 | 120.34 | 120.32 | 120.57 | 121.96 |
| C15-C16-C17 | 120.19 | 120.30 | 119.62 | 116.90 |
| C16-C17-C18 | 119.89 | 119.85 | 120.23 | 121.54 |
| C17-C18-C12 | 120.51 | 120.50 | 121.52 | 121.95 |

|             |        |        |        |        |
|-------------|--------|--------|--------|--------|
| C18-C12-C11 | 119.57 | 119.62 | 117.45 | 116.59 |
| C12-C11-C15 | 119.49 | 119.41 | 120.40 | 120.88 |
| C12-C13-O19 | 120.69 | 120.88 | —      | —      |
| C12-C13-C19 | —      | —      | 119.99 | 120.10 |
| C14-C13-O19 | 120.43 | 120.75 | —      | —      |
| C14-C13-C19 | —      | —      | 120.39 | 120.61 |
| C13-C14-C20 | 117.67 | 115.56 | 122.99 | 122.96 |
| C9-C14-C20  | 123.37 | 125.55 | 118.51 | 118.41 |
| C19-C20-C21 | —      | 132.36 | —      | —      |
| C13-C19-C22 | —      | —      | 120.55 | 120.89 |
| C19-C22-N23 | —      | —      | 175.55 | 177.00 |
| C13-C19-C21 | —      | —      | 122.81 | 123.12 |
| C19-C21-O24 | —      | —      | 125.19 | 126.23 |
| C19-C21-O25 | —      | —      | 117.62 | 112.56 |
| C20-C21-C22 | —      | 124.76 | —      | —      |
| C21-C22-N23 | —      | 176.41 | —      | —      |
| C20-C21-C24 | —      | 117.81 | —      | —      |
| C21-C24-O25 | —      | 124.56 | —      | —      |
| C21-C24-O26 | —      | 112.27 | —      | —      |
| C26-C27-C28 | —      | —      | 121.93 | 121.79 |
| C27-C28-C29 | —      | 121.83 | 120.86 | 120.84 |
| C28-C29-C30 | —      | 120.86 | 117.80 | 117.86 |
| C29-C30-C31 | —      | 117.80 | 120.87 | 120.83 |
| C30-C31-C32 | —      | 120.87 | —      | —      |
| C30-C31-C26 | —      | —      | 121.80 | 121.80 |
| C31-C26-C27 | —      | —      | 116.84 | 116.86 |
| C31-C32-C27 | —      | 121.80 | —      | —      |
| C33-C27-C28 | —      | 116.84 | —      | —      |
| C30-N33-C34 | —      | 120.76 | —      | —      |
| C30-N33-C40 | —      | 120.76 | —      | —      |
| C33-C34-C35 | —      | —      | 120.19 | 120.27 |

|              |   |        |        |        |
|--------------|---|--------|--------|--------|
| C34-C35-C36  | — | 120.19 | 120.43 | 120.48 |
| C35-C36-C37  | — | 120.43 | 119.44 | 119.35 |
| C36-C37-C38  | — | 119.44 | 120.43 | 120.43 |
| C37-C38-C39  | — | 120.43 | —      | —      |
| C37-C38-C33  | — | —      | 120.19 | 120.28 |
| C38-C39-C34  | — | 120.19 | —      | —      |
| C34-C33-C40  | — | 118.48 | —      | —      |
| C39-C40-C41  | — | —      | 120.19 | 120.29 |
| C40- C41-C42 | — | 120.19 | 120.43 | 120.48 |
| C41-C42-C43  | — | 120.43 | 119.44 | 119.34 |
| C42-C43-C44  | — | 119.44 | 120.43 | 120.48 |
| C43-C44-C39  | — | —      | 120.18 | 120.20 |
| C44-C39-C40  | — | —      | 119.32 | 119.12 |
| C43-C44-C45  | — | 120.43 | —      | —      |
| C44-C45-C40  | — | 120.18 | —      | —      |

**Torsion angle (°)**

|                 |         |         |         |         |
|-----------------|---------|---------|---------|---------|
| C2-C3-C4-N7     | -179.99 | 178.89  | 179.85  | 179.77  |
| C3-C4-N7-C8     | 179.88  | -179.74 | -179.33 | 179.79  |
| C4-N7-C8-C11    | -179.99 | 178.28  | 178.36  | 178.07  |
| N7-C8-C11-C15   | -0.03   | 2.29    | -3.80   | -6.58   |
| C1-C6-C5-O10    | 179.99  | 179.30  | -178.80 | -79.95  |
| C5-O10-C9-C14   | 180.00  | -179.73 | -179.66 | 179.00  |
| O10-C9-C14-C13  | -179.89 | -179.05 | -178.53 | 174.54  |
| C9-C14-C13-O19  | 179.86  | —       | —       | —       |
| C9-C14-C13-C19  | —       | -175.53 | 176.85  | 175.92  |
| O10-C9-C14-C20  | 0.06    | 1.72    | -4.36   | 4.84    |
| C14-C13-C12-C18 | -179.92 | 176.83  | -168.20 | -165.76 |
| C12-C13-C14-C20 | 179.92  | -179.63 | -178.23 | -179.00 |
| C18-C12-C13-C19 | —       | —       | 10.64   | 13.15   |
| C18-C12-C13-O19 | 0.09    | -2.09   | —       | —       |
| C12-C13-C19-C21 | —       | —       | 43.23   | 43.15   |



|                  |   |        |         |         |
|------------------|---|--------|---------|---------|
| C12-C13-C19-C22  | — | —      | -137.78 | -139.28 |
| C13-C19-C22-N23  | — | —      | 129.59  | 103.73  |
| C13-C19-C21-O24  | — | —      | 12.47   | 12.80   |
| C13-C19-C21-O25  | — | —      | -171.15 | -170.89 |
| C19-C13-C14-C20  | — | -0.71  | —       | —       |
| C13-C14-C20-C21  | — | 151.79 | —       | —       |
| C14-C20-C21-C24  | — | 178.11 | —       | —       |
| C20-C21-C24-O26  | — | -76.71 | —       | —       |
| C20-C21-C22-O25  | — | -3.45  | —       | —       |
| C14-C20-C21-C22  | — | -7.91  | —       | —       |
| C20-C21-C22-N23  | — | 112.10 | —       | —       |
| C24-C21-C22-N23  | — | 61.92  | —       | —       |
| C14-C13-C19-C22  | — | —      | 41.04   | 39.61   |
| C13-C19-C22-N23  | — | —      | 129.59  | 103.73  |
| C15-C16-C26-C27  | — | —      | —       | -152.92 |
| C15-C16-C26-C31  | — | —      | —       | 26.58   |
| C17-C16-C26-C27  | — | —      | —       | 24.78   |
| C17-C16-C26-C31  | — | —      | —       | -155.71 |
| C2-C1-C26-C27    | — | —      | -154.38 | —       |
| C1-C26-C27-C28   | — | —      | -179.98 | —       |
| C2-C1-C27-C28    | — | 153.87 | —       | —       |
| C2-C1-C27-C32    | — | -26.15 | —       | —       |
| C6-C1-C26-C31    | — | —      | -154.31 | —       |
| C6-C1-C31-C30    | — | —      | 179.46  | —       |
| C6-C1-C27-C28    | — | -25.85 | —       | —       |
| C6-C1-C27-C32    | — | 154.13 | —       | —       |
| C28-C29-N32-C33  | — | —      | 30.95   | -33.38  |
| C29-N32-C33-C34  | — | —      | 47.89   | -46.32  |
| C29-N32-C33-C38  | — | —      | -133.12 | 134.34  |
| C28-C29-N32-C39  | — | —      | -149.10 | 145.78  |
| C29 -N32-C39-C40 | — | —      | -133.19 | 135.40  |

|                  |   |         |       |       |
|------------------|---|---------|-------|-------|
| C29 -N32-C39-C44 | — | —       | 47.85 | 45.34 |
| C29-C30-N33-C34  | — | 29.83   | —     | —     |
| C30-N33-C34-C35  | — | 47.98   | —     | —     |
| C30-N33-C34-C39  | — | -132.90 | —     | —     |
| C31-C30-C33-C40  | — | 29.30   | —     | —     |
| C30-C33-C40-C41  | — | -132.73 | —     | —     |
| C30-C33-C40-C45  | — | 48.21   | —     | —     |

**Table S2** NBO, HOMO and LUMO calculation data

| Dyes Name | HOMO<br>(Hartree) | LUMO<br>(Hartree) | Energy gap | $E_{total}$ |
|-----------|-------------------|-------------------|------------|-------------|
| M-0       | -0.2173           | -0.1063           | 0.111      | -897.993    |
| Mol-1     | -0.1668           | -0.1315           | 0.961      | -1924.954   |
| Mol-2     | -0.1672           | -0.1372           | 0.817      | -1850.856   |
| Mol-3     | -0.1633           | -0.1369           | 0.719      | -1850.964   |

**Table S3** Adsorption energy Calculation

The obtained energies of Mol-1, Mol-2 and Mol-3 on TiO<sub>2</sub>\_anatase (1 0 1) surface determined from Monte Carlo simulation with simulation box size 43.54 × 30.20 × 54.03 Å, Fractional thickness: 4, Supercell: u= 8, v= 8 and one number of molecules in a 100kcal/mol energy window.

| Systems                                   | $E_{total}$<br>(kJmol <sup>-1</sup> ) | $E_{ads}$<br>(kJmol <sup>-1</sup> ) | $E_{rigid}$<br>(kJmol <sup>-1</sup> ) | $E_{def}$<br>(kJ mol <sup>-1</sup> ) | $dE_{ads}/dN_i$<br>(kJ mol <sup>-1</sup> ) |
|-------------------------------------------|---------------------------------------|-------------------------------------|---------------------------------------|--------------------------------------|--------------------------------------------|
| TiO <sub>2</sub> _anatase (1 0 1) + Mol-1 | -883.95                               | -1432.08                            | -1257.82                              | -174.25                              | -1432.08                                   |
| TiO <sub>2</sub> _anatase (1 0 1) + Mol-2 | -637.26                               | -1324.73                            | -1082.93                              | -241.79                              | -1324.73                                   |
| TiO <sub>2</sub> _anatase (1 0 1) + Mol-3 | -672.50                               | -900.12                             | -1147.12                              | 246.99                               | -900.12                                    |

The energy obtained from the interactions of dye molecule and the accompanying species with the *TiO<sub>2</sub>-anatase* (1 0 1) surface is represented as  $E_{interaction}$ ; and it is determined by the following expression

$$E_{interaction} = E_{total} - (E_{TiO_2\_anatase(1\ 0\ 1)} + E_{molecule}) \quad (7)$$

Where  $E_{total}$  represents the total energy of the simulation system;  $E_{TiO_2\_anatase(1\ 0\ 1)}$  is the energy of the TiO<sub>2</sub> surface; and the energy of the molecule was designated as  $E_{molecule}$
